# Supplementary material
Source: PubMed Central journal article supplement (PMC9725022)
Supplement: EIJ-D-21-00095_Sun_SD.pdf [file EIJ-D-21-00095_Sun_SD.pdf]

## Supplementary data

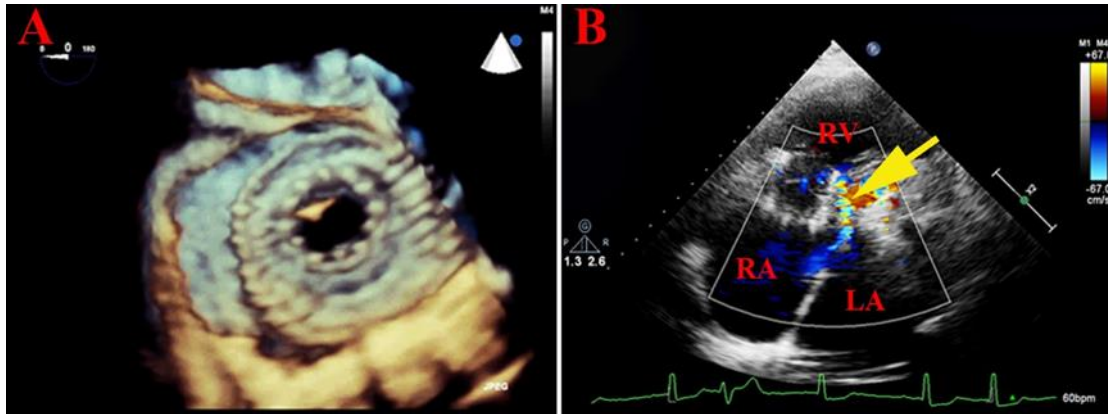

**Supplementary Figure 1.** One patient with mild paravalvular regurgitation post procedure (patient #5).

A) Three-dimensional TEE showed a normal position of the prosthetic TV.

B) Doppler echocardiography revealed mild paravalvular regurgitation and normal transvalvular gradient at three-month follow-up.

LA: left atrium; RA: right atrium; RV: right ventricle

**Supplementary Table 1. The types of artificial tricuspid valve.**

| <b>Model</b>         | <b>Stent diameter (mm)</b> | <b>Support section length (mm)</b> | <b>Valve height (mm)</b> | <b>Total length (mm)</b> | <b>Annulus size range (CTA)</b> |
|----------------------|----------------------------|------------------------------------|--------------------------|--------------------------|---------------------------------|
| <b>JS/TTVI-24-30</b> | 24                         | 30                                 | 13                       | 50                       | 25-35                           |
| <b>JS/TTVI-26-30</b> | 26                         | 30                                 | 14                       | 50                       | 25-35                           |
| <b>JS/TTVI-28-40</b> | 28                         | 40                                 | 15                       | 60                       | 35-45                           |
| <b>JS/TTVI-28-50</b> | 28                         | 50                                 | 15                       | 70                       | 35-45                           |
| <b>JS/TTVI-28-55</b> | 28                         | 55                                 | 15                       | 75                       | 45-50                           |
| <b>JS/TTVI-30-40</b> | 30                         | 40                                 | 16                       | 60                       | 35-45                           |
| <b>JS/TTVI-30-50</b> | 30                         | 50                                 | 16                       | 70                       | 35-45                           |
| <b>JS/TTVI-30-55</b> | 30                         | 55                                 | 16                       | 75                       | 45-50                           |
